# Supplementary material
Source: publisher figshare collection journal article supplement (https://sage.figshare.com/ndownloader/files/15482867)
Supplement: Supplementary file 1 [file 15482867]

**Supplementary Table 1.** Standard interview guides for participants

|                                   |                                                                                                                                                                                                                                                                                                                                                                                                                                                                                                                                                                                                                                                                                                                                                                                                                                                                                                                                                                                                                                                                                                                                                                                                                                                                                                                                                                                                                                                                                                                              |
|-----------------------------------|------------------------------------------------------------------------------------------------------------------------------------------------------------------------------------------------------------------------------------------------------------------------------------------------------------------------------------------------------------------------------------------------------------------------------------------------------------------------------------------------------------------------------------------------------------------------------------------------------------------------------------------------------------------------------------------------------------------------------------------------------------------------------------------------------------------------------------------------------------------------------------------------------------------------------------------------------------------------------------------------------------------------------------------------------------------------------------------------------------------------------------------------------------------------------------------------------------------------------------------------------------------------------------------------------------------------------------------------------------------------------------------------------------------------------------------------------------------------------------------------------------------------------|
| <b>Parents</b>                    | <ol style="list-style-type: none"> <li>1. Can you share your story with me from the beginning?</li> <li>2. How did you first find out about Soulumination or Now I Lay Me Down To Sleep?</li> <li>3. Can you describe the experience of the photo shoot?</li> <li>4. What emotions and memories do you associate with the experience of the photo shoot?</li> <li>5. How often do you look at the photographs? Where do you keep them? What do you do with them?</li> <li>6. What types of emotions and memories do the photographs evoke?</li> <li>7. What do the photographs represent to you and your family?</li> <li>8. Has the meaning of the photographs changed over time?</li> <li>9. Did you take other photographs of your baby at the time? How do these compare to the ones taken by Soulumination or NILMDTS?</li> <li>10. Have you shown the photographs to anyone? If so, to whom?</li> <li>11. Do you appreciate opportunities to share the photographs and talk about your child with others?</li> <li>12. How do others react when you share the photographs with them?</li> <li>13. Have the photographs influenced your ability to talk about your loss?</li> <li>14. Have the photographs helped your other children understand and talk about the loss?</li> <li>15. Have the photographs helped you in your grieving process? If so, in what ways?</li> <li>16. What is most important to you about the photographs?</li> <li>17. Is there anything else you would like to share with me?</li> </ol> |
| <b>Professional photographers</b> | <ol style="list-style-type: none"> <li>1. How did you first get involved with Soulumination or Now I Lay Me Down To Sleep?</li> <li>2. Can you describe a typical infant end-of-life photo shoot?</li> <li>3. What specific moments do you try to capture?</li> <li>4. Do you include any specific objects in the photographs?</li> <li>5. What style of photography do you strive for in the photographs?</li> <li>6. How do you interact with parents during the photo shoot? Do you offer parents guidance about poses?</li> <li>7. Are parents initially hesitant when you arrive? If so, how do you help put them at ease?</li> <li>8. Are there other family members present during the photo shoot? If so, who, and how do they act?</li> <li>9. Have you noticed any differences between mothers and fathers during the photo shoot?</li> <li>10. How do you work around the medical technology and deal with other challenges associated with the hospital setting?</li> <li>11. How do you edit and select the photographs that will get printed?</li> <li>12. Do you ever receive feedback from families about the photographs? If so, can you describe their reactions to the photographs after they receive them?</li> <li>13. Do you believe the photographs are healing for parents? If so, in what ways?</li> <li>14. How do you think parents reflect upon the experience of the photo shoot?</li> <li>15. Is there anything else you would like to share with me?</li> </ol>                               |
| <b>Healthcare professionals</b>   | <ol style="list-style-type: none"> <li>1. How did you first find out about Soulumination or Now I Lay Me Down To Sleep?</li> <li>2. Is this a common practice at your institution? Is it recommended at your institution?</li> <li>3. Would you recommend it? If so, why?</li> <li>4. Has this practice become more accepted at your institution over the past 5 to 10 years?</li> <li>5. How do families find out about these services? Can you describe the referral process?</li> <li>6. Have you encountered any resistance to the idea, either from parents or from other staff members?</li> <li>7. How do parents react when you bring up the idea?</li> <li>8. What do you think is unique about the Soulumination or Now I Lay Me Down To Sleep photographs?</li> <li>9. Have you ever been present during a photo shoot? If so, can you describe the experience?</li> <li>10. Have you ever been present when families receive the photographs? If so, can you describe the experience?</li> <li>11. Do you believe the photographs help families in the grieving process? If so, in what ways?</li> <li>12. Is there anything else you would like to share with me?</li> </ol>                                                                                                                                                                                                                                                                                                                                    |
